# Supplementary material for: Intraindividual comparison of 3-T and 5-T gadoxetic acid-enhanced MRI for evaluating HCC: initial results
Source: Research Square preprint supplement (doi:10.21203/rs.3.rs-8275712/v1), 2025-12-12
Supplement: Supplementary file 1 [file ca25c7ce5451d13d4c826cb0.docx]

Table S1 Sequence parameters for 3-T and 5-T imaging

| Parameters | In-Out Phase | T2WI | DWI | Quick-3D |
| --- | --- | --- | --- | --- |
| Repetition time/Echo time (ms) | 4.41/1.19-2.26 | 3274/76.2 | 4216/53 | 3.03/1.16 |
| Field of view (mm2) | 300×400 | 300×400 | 300×380 | 300×400 |
| Flip angle (◦) | 12 | 90 | 90 | 12 |
| Matrix size | 235×368 | 336×336 | 114×114 | 227×336 |
| Number of excitation | 2 | 2 | 2 | 1 |
| Thickness (mm) | 2.5 | 6.0 | 6.0 | 2.5 |
| Slice gap (mm) | 0 | 1 | 1 | 0 |
| Acquisition time (min:sec ) | 0:18 | 3:24 | 3:25 | 0:17 |

DWI: diffusion-weighted imaging; Quick-3D: parallel imaging accelerated 3D fast spoiled gradient echo T1-weighted imaging; T2WI: T2-weighted imaging

Table S2 Sequence parameters for PI- and ACS-accelerated quick-3D imaging during hepatobiliary phase at 5-T

|  | PI | ACS |
| --- | --- | --- |
| Repetition time/Echo time (ms) | 3.14/1.45 | 3.49/1.43 |
| Field of view (mm2) | 300×400 | 300×400 |
| Acquired voxel size (mm3) | 1.1×1.0×5.0 | 1.3×1.3×1.3 |
| Reconstruction voxel size (mm3) | 0.5×0.5×2.5 | 0.6×0.6×0.6 |
| Slices | 80 | 280 |
| Acceleration method | PI | ACS |
| Acceleration factor | 2.00 | 8.86 |
| Acquisition time (s) | 17.0 | 18.0 |

ACS: artificial intelligence-assisted compressed sensing; quick-3D: 3D fast spoiled gradient echo T1-weighted imaging; PI: parallel imaging

Table S3 Image quality scores (means ± standard deviations) and κ values of the two readers for 3-T and 5-T images

|  | 3-T pre-contrast | | | | 5-T pre-contrast | | | |
| --- | --- | --- | --- | --- | --- | --- | --- | --- |
|  | Image artifacts | Clarity of lesion margins | Liver edge clarity | Overall image quality | Image artifacts | Clarity of lesion margins | Liver edge clarity | Overall image quality |
| Reader 1 | 3.70±0.53 | 3.68±0.55 | 3.75±0.52 | 3.71±0.53 | 3.89±0.50 | 3.93±0.54 | 4.00±0.52 | 3.86±0.52 |
| Reader 2 | 3.78±0.50 | 3.71±0.53 | 3.89±0.57 | 3.82±0.62 | 3.96±0.43 | 3.86±0.52 | 4.04±0.47 | 3.97±0.43 |
| κ  (95% CI) | 0.765  (0.457-0.883) | 0.653  (0.425-0.913) | 0.699  (0.432-0.875) | 0.738  (0.553-0.911) | 0.704  (0.375-0.871) | 0.765  (0.495-0.891) | 0.750  (0.483-0.871) | 0.722  (0.417-0.887) |

|  | 3-T early-AP | | | | 5-T early-AP | | | |
| --- | --- | --- | --- | --- | --- | --- | --- | --- |
|  | Image artifacts | Clarity of lesion margins | Liver edge clarity | Overall image quality | Image artifacts | Clarity of lesion margins | Liver edge clarity | Overall image quality |
| Reader 1 | 3.79±0.45 | 3.71±0.71 | 3.68±0.67 | 3.64±0.68 | 3.86±0.52 | 4.11±0.42 | 3.96±0.51 | 4.07±0.52 |
| Reader 2 | 3.86±0.52 | 3.75±0.52 | 3.79±0.50 | 3.75±0.65 | 4.02±0.58 | 4.18±0.48 | 4.08±0.38 | 4.16±0.55 |
| κ  (95% CI) | 0.671  (0.376-0.927) | 0.670  (0.360-0.945) | 0.719  (0.478-0.894) | 0.7255  (0.533-0.906) | 0.697  (0.475-0.866) | 0.795  (0.608-0.899) | 0.849  (0.674-0.930) | 0.773  (0.555-0.890) |

|  | 3-T late-AP | | | | 5-T late-AP | | | |
| --- | --- | --- | --- | --- | --- | --- | --- | --- |
|  | Image artifacts | Clarity of lesion margins | Liver edge clarity | Overall image quality | Image artifacts | Clarity of lesion margins | Liver edge clarity | Overall image quality |
| Reader 1 | 3.89±0.57 | 3.64±0.736 | 3.64±0.62 | 3.68±0.55 | 4.11±0.50 | 4.21±0.52 | 4.00±0.47 | 4.18±0.55 |
| Reader 2 | 3.93±0.60 | 3.79±0.68 | 3.61±0.55 | 3.77±0.56 | 4.04±0.51 | 4.32±0.46 | 4.11±0.51 | 4.21±0.57 |
| κ  (95% CI) | 0.843  (0.690-0.924) | 0.644  (0.331-0.844) | 0.673  (0.458-0.863) | 0.717  (0.458-0.924) | 0.794  (0.605-0.899) | 0.768  (0.29-0.898) | 0.801  (0.515-0.903) | 0.780  (0.545-0.896) |

|  | 3-T PVP | | | | 5-T PVP | | | |
| --- | --- | --- | --- | --- | --- | --- | --- | --- |
|  | Image artifacts | Clarity of lesion margins | Liver edge clarity | Overall image quality | Image artifacts | Clarity of lesion margins | Liver edge clarity | Overall image quality |
| Reader 1 | 3.61±0.50 | 3.57±0.57 | 3.75±0.62 | 3.64±0.56 | 3.82±0.55 | 4.14±0.55 | 4.07±0.46 | 4.14±0.45 |
| Reader 2 | 3.64±0.49 | 3.64±0.55 | 3.79±0.57 | 3.68±0.48 | 3.75±0.52 | 4.21±0.42 | 4.14±0.45 | 4.18±0.50 |
| κ  (95% CI) | 0.778  (0.576-0.891) | 0.731  (0.501-0.952) | 0.777  (0.569-0.936) | 0.828  (0.626-0.920) | 0.770  (0.520-0.897) | 0.811  (0.635-0.908) | 0.830  (0.668-0.917) | 0.818  (0.562-0.904) |

|  | 3-T TP | | | | 5-T TP | | | |
| --- | --- | --- | --- | --- | --- | --- | --- | --- |
|  | Image artifacts | Clarity of lesion margins | Liver edge clarity | Overall image quality | Image artifacts | Clarity of lesion margins | Liver edge clarity | Overall image quality |
| Reader 1 | 3.75±0.59 | 3.70±0.48 | 3.61±0.63 | 3.71±0.53 | 3.96±0.69 | 4.10±0.42 | 4.07±0.38 | 4.03±0.58 |
| Reader 2 | 3.71±0.71 | 3.61±0.74 | 3.57±0.69 | 3.54±0.58 | 3.93±0.71 | 4.07±0.47 | 4.21±0.50 | 4.12±0.54 |
| κ  (95% CI) | 0.810  (0.616-0.940) | 0.740  (0.435-0.931) | 0.743  (0.542-0.928) | 0.788  (0.590-0.935) | 0.819  (0.639-0.932) | 0.785  (0.507-0.902) | 0.787  (0.536-0.902) | 0.770  (0.461-0.885) |

|  | 3-T HBP with parallel imaging | | | | 5-T HBP with parallel imaging | | | |
| --- | --- | --- | --- | --- | --- | --- | --- | --- |
|  | Image artifacts | Clarity of lesion margins | Liver edge clarity | Overall image quality | Image artifacts | Clarity of lesion margins | Liver edge clarity | Overall image quality |
| Reader 1 | 3.79±0.49 | 3.71±0.62 | 3.75±0.58 | 3.79±0.63 | 3.93±0.60 | 4.11±0.49 | 4.04±0.51 | 4.14±0.52 |
| Reader 2 | 3.71±0.60 | 3.64±0.68 | 3.68±0.61 | 3.62±0.60 | 3.89±0.30 | 4.01±0.54 | 4.00±0.61 | 4.07±0.54 |
| κ  (95% CI) | 0.763  (0.538-0.900) | 0.735  (0.418-0.954) | 0.723  (0.541-0.925) | 0.807  (0.621-0.934) | 0.867  (0.679-0.936) | 0.833  (0.651-0.915) | 0.826  (0.575-0.9130) | 0.839  (0.614-0.921) |

AP: arterial phase; CI: confidence interval; HBP: hepatobiliary phase; PVP: portal venous phase; TP: transitional phase

Table S4 Image quality scores (means ± standard deviations) and κ values of the two readers for ACS-accelerated hepatobiliary phase imaging

|  | Image artifacts | Clarity of lesion margins | Liver edge clarity | Overall image quality |
| --- | --- | --- | --- | --- |
| Reader 1 | 4.08±0.58 | 4.28±0.46 | 4.36±0.48 | 4.32±0.55 |
| Reader 2 | 4.19±0.62 | 4.36±0.48 | 4.39±0.51 | 4.39±0.50 |
| κ  (95% CI) | 0.812  (0.614-0.931) | 0.837  (0.689-0.923) | 0.772  (0.535-0.891) | 0.857  (0.675-0.935) |

ACS: artificial intelligence-assisted compressed sensing; CI: confidence interval

Table S5 SNR, CNR (means ± standard deviations) and ICC values of the two readers for 3-T and 5-T images

|  | 5-T SNR | | | | | | |
| --- | --- | --- | --- | --- | --- | --- | --- |
|  | Pre-contrast | Early AP | Late AP | PVP | TP | HBP with PI | HBP with ACS |
| Reader 1 | 39.98±9.02 | 38.38±9.84 | 41.19±9.08 | 58.15±11.39 | 47.42±8.25 | 53.24±5.74 | 58.59±10.74 |
| Reader 2 | 40.26±9.18 | 39.84±11.11 | 60.86±8.86 | 58.71±12.15 | 48.92±9.64 | 51.83±6.89 | 59.28±13.32 |
| ICC  (95% CI) | 0.914  (0.824-0.959) | 0.902  (0.797-0.954) | 0.866  (0.731-0.936) | 0.908  (0.812-0.956) | 0.890  (0.769-0.948) | 0.808  (0.627-0.906) | 0.866  (0.731-0.935) |

|  | 3-T SNR | | | | | |
| --- | --- | --- | --- | --- | --- | --- |
|  | Pre-contrast | Early AP | Late AP | PVP | TP | HBP with PI |
| Reader 1 | 35.72±11.44 | 29.85±7.04 | 34.54±7.84 | 50.08±8.82 | 37.97±8.18 | 43.48±9.96 |
| Reader 2 | 37.36±11.28 | 32.00±6.83 | 36.99±8.15 | 51.73±8.29 | 39.34±8.45 | 44.76±9.99 |
| ICC  (95% CI) | 0.912  (0.819-0.958) | 0.828  (0.577-0.926) | 0.904  (0.528-0.968) | 0.900  (0.772-0.955) | 0.910  (0.803-0.959) | 0.930  (0.855-0.967) |

|  | 5-T CNR | | | | | | |
| --- | --- | --- | --- | --- | --- | --- | --- |
|  | Pre-contrast | Early AP | Late AP | PVP | TP | HBP with PI | HBP with ACS |
| Reader 1 | 8.65±3.04 | 13.17±4.67 | 17.17±5.59 | 12.36±4.10 | 8.41±2.95 | 15.75±5.24 | 20.29±5.77 |
| Reader 2 | 9.56±4.41 | 13.66±5.27 | 16.35±5.99 | 12.96±5.18 | 9.34±3.74 | 14.73±5.71 | 20.42±6.02 |
| ICC  (95% CI) | 0.842  (0.688-0.924) | 0.791  (0.599-0.897) | 0.873  (0.745-0.936) | 0.730  (0.499-0.865) | 0.806  (0.589-0.909) | 0.889  (0.775-0.947) | 0.857  (0.715-0.931) |

|  | 3-T CNR | | | | | |
| --- | --- | --- | --- | --- | --- | --- |
|  | Pre-contrast | Early AP | Late AP | PVP | TP | HBP with PI |
| Reader 1 | 10.21±2.45 | 7.51±3.15 | 12.42±4.15 | 8.11±3.16 | 5.53±2.04 | 10.57±3.96 |
| Reader 2 | 10.59±3.29 | 8.09±4.06 | 13.04±5.61 | 8.92±3.74 | 6.03±2.55 | 11.18±4.85 |
| ICC  (95% CI) | 0.707  (0.462-0.852) | 0.861  (0.721-0.933) | 0.863  (0.728-0.934) | 0.784  (0.586-0.894) | 0.811  (0.633-0.908) | 0.881  (0.760-0.943) |

ACS: artificial intelligence-assisted compressed sensing; AP: arterial phase; CI: confidence interval; HBP: hepatobiliary phase; ICC: intraclass correlation coefficient; PI: parallel imaging; PVP: portal venous phase; TP: transitional phase

Table S6 Diagnostic Performance of MRI LI-RADS v2018

| LI-RADS v2018 Category | No. of Observations (%) | Per-patient final diagnosis (HCC/ICC) |
| --- | --- | --- |
| LR-5 | 93.10% (27/29) | 27/0 |
| LR-M | 6.90% (2/29) | 0/2 |

HCC: hepatocellular carcinoma; ICC: intrahepatic cholangiocarcinoma; LI-RADS v2018: Liver Imaging Reporting and Data System version 2018

Table S7 Comparisons the detection rate of peritumoral hypointensity on HBP images between 3-T and 5-T, as well as PI and ACS images

| HBP with PI at 3-T | HBP with PI at 5-T | HBP with ACS at 5-T | P value1 | P value2 | P value3 |
| --- | --- | --- | --- | --- | --- |
| 4 (14.81%) | 5 (18.52%) | 8 (29.63%) | >0.999 | 0.043 | 0.199 |

Data are counts (percentages); ACS: artificial intelligence-assisted compressed sensing; HBP: hepatobiliary phase; PI: parallel imaging

1P value between HBP imaging with PI at 3-T and 5-T

2P value between HBP imaging with PI at 3-T and with ACS at 5-T

1P value between HBP imaging with PI and ACS at 5-T

Table S8 Imaging features with no significant difference between post-contrast enhanced imaging at 3-T and 5-T

|  | Non-rim APHE | Nonperipheral washout | Nonenhancing capsule | Nodule in nodule | Mosaic structure | Blood products in mass | Fat in mass |
| --- | --- | --- | --- | --- | --- | --- | --- |
| 3-T PI | 27 (93.10%) | 27 (93.10%) | 3 (10.34%) | 2 (6.90%) | 7 (24.14%) | 5 (17.24%) | 3 (10.34%) |
| 5-T PI | 27 (93.10%) | 27 (93.10%) | 3 (10.34%) | 2 (6.90%) | 7 (24.14%) | 5 (17.24%) | 3 (10.34%) |

|  | Rim APHE | Peripheral washout | Delayed central enhancement | Delayed central enhancement | Targetoid TP/HBP appearance |
| --- | --- | --- | --- | --- | --- |
| 3-T PI | 2 (6.90%) | 2 (6.90%) | 2 (6.90%) | 2 (6.90%) | 2 (6.90%) |
| 5-T PI | 2 (6.90%) | 2 (6.90%) | 2 (6.90%) | 2 (6.90%) | 2 (6.90%) |

APHE: arterial phase hyperenhancement; HBP: hepatobiliary phase; PI: parallel imaging; TP: transition phase


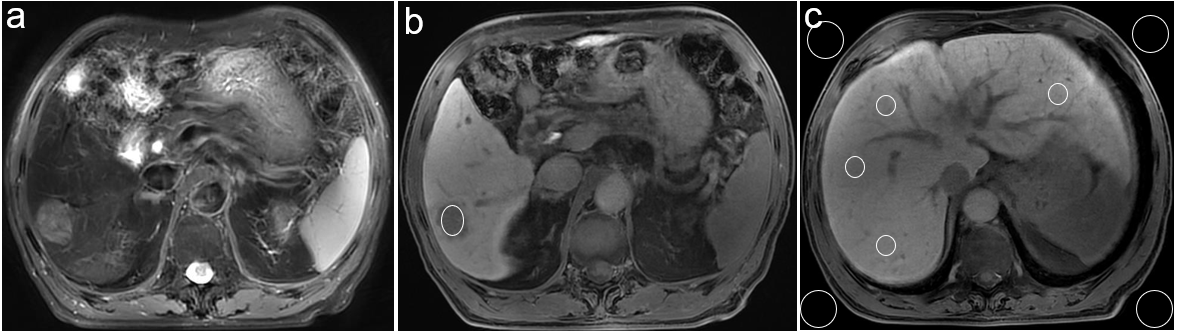


Figure S1 The schematic diagram of ROIs. (a) T2-weighted image, (b) HBP image that displays the lesion with the largest cross-sectional area, and (c) HBP image for drawing the ROIs of liver parenchyma and background.

HBP: hepatobiliary phase; ROI: region-of-interest
